# Supplementary material
Source: PubMed Central journal article supplement (PMC5788306)
Supplement: NIHMS927564-supplement-8.pdf [file NIHMS927564-supplement-8.pdf]

**Table S1: Conditions used in this study. Treatment was in rich medium (YPD) unless otherwise noted. Related to Figures 2-4.**

| Drug                     | Concentration | Type                                                                                      | Solvent (stock)         | Supplier                                         |
|--------------------------|---------------|-------------------------------------------------------------------------------------------|-------------------------|--------------------------------------------------|
| 4-nitroquinoline-1-oxide | 2 $\mu$ M     | DNA damage; oxidative stress                                                              | DMSO (1,500x)           | Sigma-Aldrich (N8141)                            |
| 5-fluorocytosine         | 2 mM          | Nucleoside analog; used in combination with Amphotericin B for some severe infections     | H <sub>2</sub> O (50x)  | Alfa Aesar (AAAL16496-MD)                        |
| 5-fluorouracil           | 2 mM          | Nucleoside analog; commonly used chemotherapeutic                                         | DMSO (50x)              | Oakwood Products (003241-50204166)               |
| Amphotericin B           | 2 $\mu$ M     | Antifungal; natural product; low incidence of drug resistance, but extensive side effects | DMSO (1,000x)           | MP Biomedicals (19504380)                        |
| Anisomycin               | 40 $\mu$ M    | Translation inhibitor                                                                     | DMSO (1,000x)           | R&D Systems (129010)                             |
| Clotrimazole             | 2.7 $\mu$ M   | 1 <sup>st</sup> generation imidazole                                                      | DMSO (10,000x)          | Santa Cruz Biotechnology (3583A)                 |
| Cobalt Cl <sub>2</sub>   | 3.4 mM        | Heavy metal                                                                               | H <sub>2</sub> O (350x) | Sigma-Aldrich (C8661)                            |
| Congo Red                | 37 $\mu$ g/mL | Amyloid stain                                                                             | 80% EtOH (150x)         | Alfa Aesar (501201993)                           |
| CuSO <sub>4</sub>        | 2 mg/mL       | Heavy metal; oxidative stress                                                             | H <sub>2</sub> O (150x) | J.T. Baker Chemical Company (1-1843), Lot 817126 |
| Doxorubicin              | 20 $\mu$ M    | DNA damage                                                                                | H <sub>2</sub> O (300x) | LC Laboratories (NC0009654)                      |

|                           |             |                                                        |                                  |                                            |
|---------------------------|-------------|--------------------------------------------------------|----------------------------------|--------------------------------------------|
| Ferulic Acid              | 10 mM       | Antioxidant;<br>abundant in plants                     | DMSO (150x)                      | Indofine<br>Chemical<br>(50908030)         |
| Fluconazole               | 100 $\mu$ M | 2 <sup>nd</sup> generation<br>triazole                 | H <sub>2</sub> O (200x)          | Alfa Aesar<br>(J62015-06)                  |
| Guanidinium HCl           | 5 mM        | Hsp104 inhibitor;<br>denaturant                        | H <sub>2</sub> O (150x)          | Sigma-Aldrich<br>(G4505)                   |
| Itraconazole              | 35 $\mu$ M  | 2 <sup>nd</sup> generation<br>triazole                 | DMSO (150x)                      | Acros Organics<br>(AC452870050)            |
| Ketoconazole              | 35 $\mu$ M  | 1 <sup>st</sup> generation<br>imidazole                | DMSO (500x)                      | Ark Pharm Inc.<br>(50653529)               |
| Manganese Cl <sub>2</sub> | 10 mM       | Diverse mechanisms                                     | H <sub>2</sub> O (150x)          | Sigma-Aldrich<br>(244589)                  |
| Methotrexate              | 100 $\mu$ M | Chemotherapeutic;<br>antimetabolite;<br>DHFR inhibitor | DMSO (150x)                      | Sigma-Aldrich<br>(M8407)                   |
| MMS                       | 0.004%      | DNA damage;<br>alkylating agent                        | Original stock                   | Sigma-Aldrich<br>(129925) Lot<br>MKBR6050V |
| Progesterone              | 250 $\mu$ M | Steroid hormone                                        | EtOH (600x)                      | Santa Cruz<br>Biotechnology<br>(296138)    |
| Prothioconazole           | 15 $\mu$ M  | Agricultural azole                                     | DMSO<br>(2,000x)                 | Santa Cruz<br>Biotechnology<br>(229011)    |
| Quinidine                 | 4 mM        | Ion channel blocker                                    | DMSO (150x)                      | Santa Cruz<br>Biotechnology<br>(215772)    |
| Rapamycin                 | 5 $\mu$ M   | TOR inhibition                                         | DMSO<br>(1,000x)                 | LC Laboratories<br>(NC9949743)             |
| Selenomethionine          | 20 $\mu$ M  | Metabolite                                             | H <sub>2</sub> O (150x)          | Abcam<br>(ab143694)                        |
| Tebuconazole              | 6 $\mu$ M   | Agricultural azole                                     | Isopropyl<br>alcohol<br>(5,000x) | Santa Cruz<br>Biotechnology<br>(204906)    |

|                 |              |                                        |                         |                             |
|-----------------|--------------|----------------------------------------|-------------------------|-----------------------------|
| Trifluoperazine | 17.5 $\mu$ M | Calmodulin inhibitor;<br>antipsychotic | H <sub>2</sub> O (150x) | Abcam<br>(ab120739)         |
| Voriconazole    | 5 $\mu$ M    | 3 <sup>rd</sup> generation triazole    | DMSO (5000x)            | Astratech Inc<br>(50955566) |
